# Supplementary material
Source: PubMed Central journal article supplement (PMC7091394)
Supplement: jamapediatr-174-665-s001.pdf [file jamapediatr-174-665-s001.pdf]

## Supplementary Online Content

Madigan S, McArthur BA, Anhorn C, Eirich R, Christakis DA. Associations between screen use and child language skills: a systematic review and meta-analysis. Published March 23, 2020. *JAMA Pediatr*. doi:10.1001/jamapediatrics.2020.0327

**eTable 1.** Educational Content Description

**eTable 2.** Search Strategy

**eTable 3.** Criteria for Assessing Study Quality for All Studies Included in the Meta-analysis

**eTable 4.** Study Quality Scoring for Each Study Included in the Meta-analysis

**eTable 5.** Results of Moderator Analysis for Duration of Screen Use and Child Language

**eTable 6.** Results of Moderator Analysis for Background Television and Child Language

**eTable 7.** Results of Moderator Analysis for Educational Screen Use and Child Language

**eTable 8.** Results of Moderator Analysis for Co-viewing Screens and Child Language

**eFigure 1.** Funnel Plot of Studies Examining Quantity of Screen Use to Child Language

**eFigure 2.** Funnel Plot of Studies Examining Educational Programming to Child Language

**eFigure 3.** Funnel Plot of Studies Examining Co-viewing to Child Language

**eFigure 4.** Funnel Plot of Studies Examining Background Television to Child Language

**eFigure 5.** Meta-Regression Scatterplot Examining Child Sex on the Association between Co-Viewing and Child Language

**eFigure 6.** Funnel Plot of Studies Examining Age of Onset of Screen Use to Child Language

This supplementary material has been provided by the authors to give readers additional information about their work.

**eTable 1:** Educational content description

| Article                        | Definition of Educational Content                                                                                                                                                                                                                                                                                                                                    |
|--------------------------------|----------------------------------------------------------------------------------------------------------------------------------------------------------------------------------------------------------------------------------------------------------------------------------------------------------------------------------------------------------------------|
| Alloway (2014) <sup>1</sup>    | Children’s educational programs (e.g., Blue Peter) and baby educational DVDs (e.g., Baby Einstein).                                                                                                                                                                                                                                                                  |
| Arraf (1991) <sup>2</sup>      | Educational programming broadcasted mainly by the Public Tv station (PBC), in addition to any taped educational TV content (VCR, pay channels).                                                                                                                                                                                                                      |
| Barr (2010) <sup>3</sup>       | Programs created for preschool audiences and younger and included PBS preschool programs (e.g., Arthur, Sesame Street, and Clifford), Nickelodeon preschool programs (e.g., Blues Clues and Dora the Explorer), baby-directed videos (e.g., Baby Mozart), and Disney movies (e.g., Finding Nemo).                                                                    |
| Hudon (2013) <sup>4</sup>      | Four programs which have been previously correlated with increased vocabulary scores qualified as “educational programs.” These programs included: Blue’s Clues, Dora the Explorer, Sesame Street, and Go, Diego, Go.                                                                                                                                                |
| Rice (1990) <sup>5</sup>       | Sesame Street.                                                                                                                                                                                                                                                                                                                                                       |
| Selnow (1982) <sup>6</sup>     | Electric Company, Sesame Street, Mr. Rogers.                                                                                                                                                                                                                                                                                                                         |
| Tomopoulos (2010) <sup>7</sup> | Educational young child–oriented programs consisted primarily of those with educational content intended for children 2 to 6 years old, including live action and animated programs (e.g., Sesame Street and Blue’s Clues). In addition, media marketed as infant-directed and educational (e.g., Baby Einstein and Brainy Baby) was also included in this category. |
| Wright (2001) <sup>8</sup>     | Child-audience, informative or educational programs (regardless of animation). These programs included: Sesame Street, Mister Rogers’ Neighborhood, Reading Rainbow, Captain Kangaroo, Mr. Wizard’s World, and 3-2-1 Contact.                                                                                                                                        |
| Yang (2017) <sup>9</sup>       | Live educational children’s programs (e.g., Tree of Knowledge), and educational cartoons (e.g., Dora the Explorer, Rainbow Cat, Blue Rabbit).                                                                                                                                                                                                                        |
| Zimmerman (2007) <sup>10</sup> | Children’s educational programs on television (e.g., Sesame Street, Blue’s Clues, Arthur), and children’s educational programs on DVD/video (e.g., Sesame Street on DVD).                                                                                                                                                                                            |

**eTable 2: Search Strategy**

| <b>Databases:</b> MEDLINE, Embase, PsycINFO <1806 to March Week 3 2019> <sup>1</sup> |                                                                                                                                                                                                                                                                                      |
|--------------------------------------------------------------------------------------|--------------------------------------------------------------------------------------------------------------------------------------------------------------------------------------------------------------------------------------------------------------------------------------|
| <b>Search Strategy:</b>                                                              |                                                                                                                                                                                                                                                                                      |
| 1                                                                                    | exp television/ or screen time/ (8531)                                                                                                                                                                                                                                               |
| 2                                                                                    | exp computers/ (18918)                                                                                                                                                                                                                                                               |
| 3                                                                                    | human computer interaction/ or computer usage/ (10543)                                                                                                                                                                                                                               |
| 4                                                                                    | mobile devices/ or cellular phones/ (2180)                                                                                                                                                                                                                                           |
| 5                                                                                    | internet/ or internet usage/ or internet addiction/ (31172)                                                                                                                                                                                                                          |
| 6                                                                                    | ("cell phone*" or "i-pad*" or "i-phone*" or "mobile phone*" or "smart phone*" or "video console*" or "video game*" or cellphone* or cellular or computer* or device* or internet* or ipad* or iphone* or "screen time" or smartphone* or tablet* or television* or TV*).mp. (251532) |
| 7                                                                                    | or/1-6 (251726)                                                                                                                                                                                                                                                                      |
| 8                                                                                    | oral communication/ or verbal communication/ or verbal ability/ or verbal fluency/ (37394)                                                                                                                                                                                           |
| 9                                                                                    | language proficiency/ or pragmatics/ (9013)                                                                                                                                                                                                                                          |
| 10                                                                                   | language/ or vocabulary/ (47285)                                                                                                                                                                                                                                                     |
| 11                                                                                   | language disorders/ or communication disorders/ or specific language impairment/ or language delay/ (10520)                                                                                                                                                                          |
| 12                                                                                   | language development/ (25169)                                                                                                                                                                                                                                                        |
| 13                                                                                   | communication skills/ (7073)                                                                                                                                                                                                                                                         |
| 14                                                                                   | communication/ (24319)                                                                                                                                                                                                                                                               |
| 15                                                                                   | (speech* or language* or verbal* or pragmatics or vocabulary or communication).mp. (573360)                                                                                                                                                                                          |
| 16                                                                                   | or/8-15 (573360)                                                                                                                                                                                                                                                                     |
| 17                                                                                   | 7 and 16 (52363)                                                                                                                                                                                                                                                                     |
| 18                                                                                   | (infan* or newborn* or new-born* or neonat* or baby or babies or child* or toddler* or boy* or girl* or p?ediatric*).mp. (839699)                                                                                                                                                    |
| 19                                                                                   | 7 and 16 and 18 (8150)                                                                                                                                                                                                                                                               |
| 20                                                                                   | limit 17 to (100 childhood <birth to age 12 yrs> or 120 neonatal <birth to age 1 mo> or 140 infancy <2 to 23 mo> or 160 preschool age <age 2 to 5 yrs> or 180 school age <age 6 to 12 yrs>) (6581)                                                                                   |
| 21                                                                                   | 19 or 20 (9875)                                                                                                                                                                                                                                                                      |
| 22                                                                                   | limit 21 to yr="1960 -Current" (9770)                                                                                                                                                                                                                                                |

<sup>1</sup> Example provided is PsycINFO search

**eTable 3.** Criteria for Assessing Study Quality for All Studies Included in the Meta-analysis<sup>1</sup>

|                                        |                                                                                                                                                                                                                                                                                                                                                                  |                                                                  |
|----------------------------------------|------------------------------------------------------------------------------------------------------------------------------------------------------------------------------------------------------------------------------------------------------------------------------------------------------------------------------------------------------------------|------------------------------------------------------------------|
| 1. Question                            | Was the research question or objective in this paper clearly stated?                                                                                                                                                                                                                                                                                             | 0 = No<br>1 = Yes                                                |
| 2. Defined Sample                      | Study has a defined eligibility and exclusion criteria for their sample; and time period (dates) and location(s) of recruitment and assessment.                                                                                                                                                                                                                  | 0 = No<br>1 = Yes                                                |
| 3. Representative Sample               | Is the sample representative of a defined population? (i.e. was everyone included who should be and is this sample generalizable)<br><br>0 = Single site clinical studies or select sample (e.g., only selecting mothers of children with disabilities).<br>1 = Cohorts recruited from the general population or from multi-site studies and/or large databases. | 0 = No<br>1 = Yes                                                |
| 4. Adequate Sample Size                | Power calculation provided                                                                                                                                                                                                                                                                                                                                       | 0 = No<br>1 = Yes                                                |
| 5. Participation/Attrition             | Does the study meet satisfactory participation/attrition rates?<br><br>0= <60% participation; >40% attrition or not specified<br>1= 60-79% participation; 21-39% attrition<br>2= >80% participation, <20% attrition                                                                                                                                              | 0 = Not-acceptable<br>1= Marginally acceptable<br>2 = Acceptable |
| 6. Exposure                            | For the analyses in this paper, was the exposure of interest (screen time) measured prior to the outcome(s) being measured?                                                                                                                                                                                                                                      | 0 = No<br>1 = Yes                                                |
| 7. Level of Exposure                   | Did the study examine different levels of the exposure (Screen) as related to the outcome (e.g., high versus low users, or exposure measured as continuous variable)?                                                                                                                                                                                            | 0 = No<br>1 = Yes                                                |
| 8. Valid Instrument (Screen time)      | Does the study use a validated instrument for the assessment of screen time?<br><br>0 = Non-validated (made up by researcher, diary, number of hours)<br>1= validated measure (e.g. passive sensing, home or inperson observation)                                                                                                                               | 0 = Non-validated<br>1 = Validated                               |
| 9. Valid Instrument (Language Outcome) | Does the study use a validated instrument for the assessment of language?<br><br>0 = Non-validated (made up by researcher)<br>1= validated measure (PPVT, CDI, etc.)                                                                                                                                                                                             | 0 = Non-validated<br>1 = Validated                               |
| 10. Adjusted Effects                   | Does the study control or adjust for co-variates.                                                                                                                                                                                                                                                                                                                | 0 = No<br>1 = Yes                                                |

<sup>1</sup> Adapted from: **The National Institute of Health Quality Assessment Tool for Observational Cohort and Cross-Sectional Studies.**

<https://www.nhlbi.nih.gov/health-pro/guidelines/in-develop/cardiovascular-risk-reduction/tools/cohort>

**eTable 4.** Study Quality Scoring for Each Study Included in the Meta-analysis

| Study                                            | Question | Defined Sample | Representative Sample | Sample Size | Attrition | Exposure | Levels of Exposure | Valid Instrument (Screen) | Valid Instrument (Language) | Adjusted Effects | Score (/10) |
|--------------------------------------------------|----------|----------------|-----------------------|-------------|-----------|----------|--------------------|---------------------------|-----------------------------|------------------|-------------|
| Allen et al, 1992 <sup>11</sup>                  | Y        | N              | N                     | N           | N         | N        | Y                  | Y                         | Y                           | N                | 4           |
| Alloway et al, 2014 <sup>1</sup>                 | Y        | N              | Y                     | N           | N         | N        | Y                  | N                         | Y                           | N                | 4           |
| Arraf, 1990 <sup>2</sup>                         | Y        | N              | Y                     | N           | M         | N        | Y                  | N                         | Y                           | N                | 5           |
| Barr et al, 2010 <sup>3</sup>                    | Y        | N              | N                     | Y           | Y         | Y        | Y                  | N                         | Y                           | N                | 7           |
| Bittman et al, 2011 <sup>12</sup>                | Y        | Y              | Y                     | N           | N         | Y        | Y                  | N                         | Y                           | Y                | 7           |
| Blankson et al, 2015 <sup>13</sup>               | Y        | N              | Y                     | N           | Y         | Y        | Y                  | Y                         | Y                           | N                | 8           |
| Byeon and Hong, 2015 <sup>14</sup>               | Y        | Y              | Y                     | N           | N         | N        | Y                  | N                         | Y                           | Y                | 6           |
| Castles et al, 2013 <sup>15</sup>                | Y        | Y              | Y                     | N           | N         | N        | Y                  | Y                         | Y                           | N                | 6           |
| Chonchaiya and Pruksananonda, 2008 <sup>16</sup> | Y        | N              | N                     | N           | N         | N        | Y                  | N                         | Y                           | Y                | 4           |
| Christakis et al, 2009 <sup>17</sup>             | Y        | Y              | Y                     | N           | Y         | N        | Y                  | Y                         | Y                           | Y                | 9           |
| Duch et al, 2013 <sup>18</sup>                   | Y        | N              | N                     | N           | M         | N        | Y                  | N                         | Y                           | Y                | 5           |
| Hudon et al, 2013 <sup>4</sup>                   | Y        | N              | Y                     | N           | M         | N        | Y                  | N                         | Y                           | Y                | 6           |
| Lee et al, 2017 <sup>19</sup>                    | Y        | Y              | Y                     | N           | Y         | N        | Y                  | N                         | Y                           | Y                | 8           |
| Levin, 1978 <sup>20</sup>                        | Y        | N              | Y                     | N           | N         | N        | Y                  | N                         | Y                           | N                | 4           |
| Lin et al, 2015 <sup>21</sup>                    | Y        | N              | Y                     | N           | N         | N        | Y                  | N                         | Y                           | N                | 4           |
| Linebarger and Walker, 2005 <sup>22</sup>        | Y        | N              | Y                     | Y           | Y         | Y        | Y                  | N                         | Y                           | N                | 8           |
| Linebarger et al, 2013 <sup>23</sup>             | Y        | N              | Y                     | N           | N         | N        | Y                  | N                         | Y                           | N                | 4           |
| Masur et al, 2016 <sup>24</sup>                  | Y        | N              | Y                     | N           | N         | Y        | Y                  | N                         | Y                           | N                | 5           |

|                                           |     |      |      |     |      |      |     |      |      |      |   |
|-------------------------------------------|-----|------|------|-----|------|------|-----|------|------|------|---|
| McKean et al, 2015 <sup>25</sup>          | Y   | Y    | Y    | N   | N    | Y    | Y   | N    | Y    | N    | 6 |
| Mendelsohn et al, 2010 <sup>26</sup>      | Y   | Y    | Y    | N   | N    | Y    | Y   | N    | Y    | Y    | 7 |
| Moon et al, 2018 <sup>27</sup>            | Y   | Y    | Y    | N   | Y    | N    | Y   | N    | Y    | N    | 7 |
| Nelson, 1973 <sup>28</sup>                | Y   | Y    | Y    | N   | Y    | Y    | Y   | N    | Y    | N    | 8 |
| Pagani et al, 2013 <sup>29</sup>          | Y   | Y    | Y    | N   | M    | Y    | Y   | N    | Y    | Y    | 8 |
| Patterson, 2002 <sup>30</sup>             | Y   | N    | Y    | N   | N    | N    | Y   | N    | Y    | N    | 4 |
| Rice et al, 1990 <sup>5</sup>             | Y   | Y    | Y    | N   | Y    | Y    | Y   | N    | Y    | Y    | 9 |
| Richert et al, 2010 <sup>31</sup>         | Y   | N    | Y    | N   | Y    | N    | Y   | N    | Y    | Y    | 7 |
| Rosenqvist et al, 2016 <sup>32</sup>      | Y   | Y    | Y    | N   | N    | N    | Y   | N    | Y    | Y    | 6 |
| Ruangdaraganon et al, 2009 <sup>33</sup>  | Y   | Y    | Y    | N   | M    | Y    | Y   | N    | Y    | N    | 7 |
| Schmidt et al, 2009 <sup>34</sup>         | Y   | Y    | Y    | N   | N    | Y    | Y   | N    | Y    | Y    | 7 |
| Selnow and Bettinghaus, 1982 <sup>6</sup> | Y   | Y    | Y    | N   | N    | N    | Y   | N    | N    | N    | 4 |
| Taylor et al, 2018 <sup>35</sup>          | Y   | Y    | Y    | N   | Y    | N    | Y   | N    | Y    | Y    | 8 |
| Tomopoulos et al, 2010 <sup>7</sup>       | Y   | Y    | Y    | N   | N    | Y    | Y   | N    | Y    | Y    | 7 |
| van den Heuvel et al, 2019 <sup>36</sup>  | Y   | Y    | Y    | N   | N    | N    | Y   | N    | Y    | Y    | 6 |
| Wright et al, 2001 <sup>8</sup>           | Y   | Y    | Y    | N   | M    | Y    | Y   | N    | Y    | N    | 7 |
| Yang et al, 2017 <sup>9</sup>             | Y   | N    | N    | N   | N    | N    | Y   | N    | Y    | N    | 3 |
| Zimmerman et al, 2007 <sup>9</sup>        | Y   | Y    | Y    | N   | M    | N    | Y   | N    | Y    | N    | 6 |
| Zimmerman et al, 2009 <sup>37</sup>       | Y   | Y    | Y    | N   | Y    | N    | Y   | Y    | Y    | Y    | 9 |
| Total % Yes                               | 100 | 56.8 | 86.5 | 5.4 | 21.6 | 37.8 | 100 | 13.5 | 97.3 | 45.9 |   |

Abbreviations: N, No; Y, Yes; M, Marginal

**eTable 5.** Results of Moderator Analysis for Duration of Screen Use and Child Language

| <b>Categorical Moderators</b>      | <b>k</b> | <b>Estimate<br/>r</b> | <b>95% CI</b> | <b>Q</b>       | <b>p-<br/>value</b> |
|------------------------------------|----------|-----------------------|---------------|----------------|---------------------|
| <i>Study Design</i>                |          |                       |               | 0.49           | .49                 |
| Cross-Sectional                    | 24       | -.14***               | -21 to -.08   |                |                     |
| Longitudinal                       | 14       | -.12***               | -.16 to -.07  |                |                     |
| <i>Screen Use Type<sup>a</sup></i> |          |                       |               | 1.18           | .28                 |
| Television only                    | 10       | -.11***               | -.16 to -.05  |                |                     |
| Mixture <sup>b</sup>               | 26       | -.15***               | -.21 to -.09  |                |                     |
| <b>Continuous Moderators</b>       | <b>k</b> | <b>b</b>              | <b>95% CI</b> | <b>z-value</b> | <b>p-<br/>value</b> |
| Study Year                         | 38       | .005                  | -.000 to .009 | 1.85           | .06                 |
| Child Age                          | 38       | -.000                 | -.002 to .001 | -0.47          | .64                 |
| Sex (% male)                       | 38       | -.004                 | -.012 to .004 | -0.97          | .33                 |
| Study Quality                      | 38       | .089                  | -.02 to .039  | 0.58           | .56                 |

k = number of samples

<sup>a</sup> = mobile only (k = 2) not included as k < 3 for categorical comparison

<sup>b</sup> = can include either television, mobiles, video games, and/or computers

**eTable 6.** Results of Moderator Analysis for Background Television and Child Language

| <b><i>Continuous Moderators<sup>a</sup></i></b> | <b><i>k</i></b> | <b><i>b</i></b> | <b><i>95% CI</i></b> | <b><i>z-value</i></b> | <b><i>p-value</i></b> |
|-------------------------------------------------|-----------------|-----------------|----------------------|-----------------------|-----------------------|
| Study Year                                      | 5               | -.001           | -.016 to .014        | -0.14                 | .90                   |
| Child Age                                       | 5               | -.006           | -.050 to .038        | -0.27                 | .79                   |
| Sex (% male)                                    | 5               | -.009           | -.031 to .048        | 0.42                  | .68                   |
| Study Quality                                   | 5               | .000            | -.122 to .123        | 0.01                  | .99                   |

*k* = number of samples

<sup>a</sup> categorical moderators not conducted as *k* < 10.



**eTable 7.** Results of Moderator Analysis for Educational Screen Use and Child Language

| <b>Categorical Moderators<sup>a</sup></b> | <b>k</b> | <b>Estimate<br/>r</b> | <b>95% CI</b> | <b>Q</b>       | <b>p-<br/>value</b> |
|-------------------------------------------|----------|-----------------------|---------------|----------------|---------------------|
| <i>Study Design</i>                       |          |                       |               | 0.25           | .62                 |
| Cross-Sectional                           | 7        | .15                   | -.03 to .31   |                |                     |
| Longitudinal                              | 6        | .10                   | -.00 to .19   |                |                     |
| <b>Continuous Moderators</b>              | <b>k</b> | <b>b</b>              | <b>95% CI</b> | <b>z-value</b> | <b>p-<br/>value</b> |
| Study Year                                | 13       | -.009                 | -.019 to .001 | -1.75          | .08                 |
| Child Age                                 | 13       | -.001                 | -.006 to .008 | 0.20           | .84                 |
| Sex (% male)                              | 13       | -.006                 | -.032 to .044 | 0.30           | .77                 |
| Study Quality                             | 13       | .034                  | -.060 to .074 | 0.20           | .85                 |

k = number of samples

<sup>a</sup> = screen type not included as k < 3 for mobile only and mix comparisons

**Table e8.** Results of Moderator Analysis for Co-viewing Screens and Child Language

| <b>Categorical Moderators<sup>a</sup></b> | <b>k</b> | <b>Estimate<br/>r</b> | <b>95% CI</b> | <b>Q</b>       | <b>p-value</b> |
|-------------------------------------------|----------|-----------------------|---------------|----------------|----------------|
| <i>Study Design</i>                       |          |                       |               | 1.76           | .18            |
| Cross-Sectional                           | 8        | .19**                 | .05 to .33    |                |                |
| Longitudinal                              | 4        | .08**                 | .01 to .15    |                |                |
| <i>Screen Use Type<sup>a</sup></i>        |          |                       |               | 0.58           | .45            |
| Television only                           | 3        | .11**                 | .01 to .20    |                |                |
| Mixture <sup>b</sup>                      | 9        | .11*                  | .06 to .33    |                |                |
| <b>Continuous Moderators</b>              | <b>k</b> | <b>b</b>              | <b>95% CI</b> | <b>z-value</b> | <b>p-value</b> |
| Study Year                                | 12       | -.011                 | -.021 to .000 | -1.91          | .06            |
| Child Age                                 | 12       | -.001                 | -.005 to .003 | -0.54          | .59            |
| Sex (% male)                              | 12       | .028                  | .006 to .051  | 2.45           | .02            |
| Study Quality                             | 12       | -.031                 | -.087 to .024 | -1.11          | .27            |

k = number of samples

<sup>a</sup> = mobile only (k = 2) not included as k < 3 for categorical comparison

**eFigure 1.** Funnel Plot of Studies Examining Quantity of Screen Use to Child Language

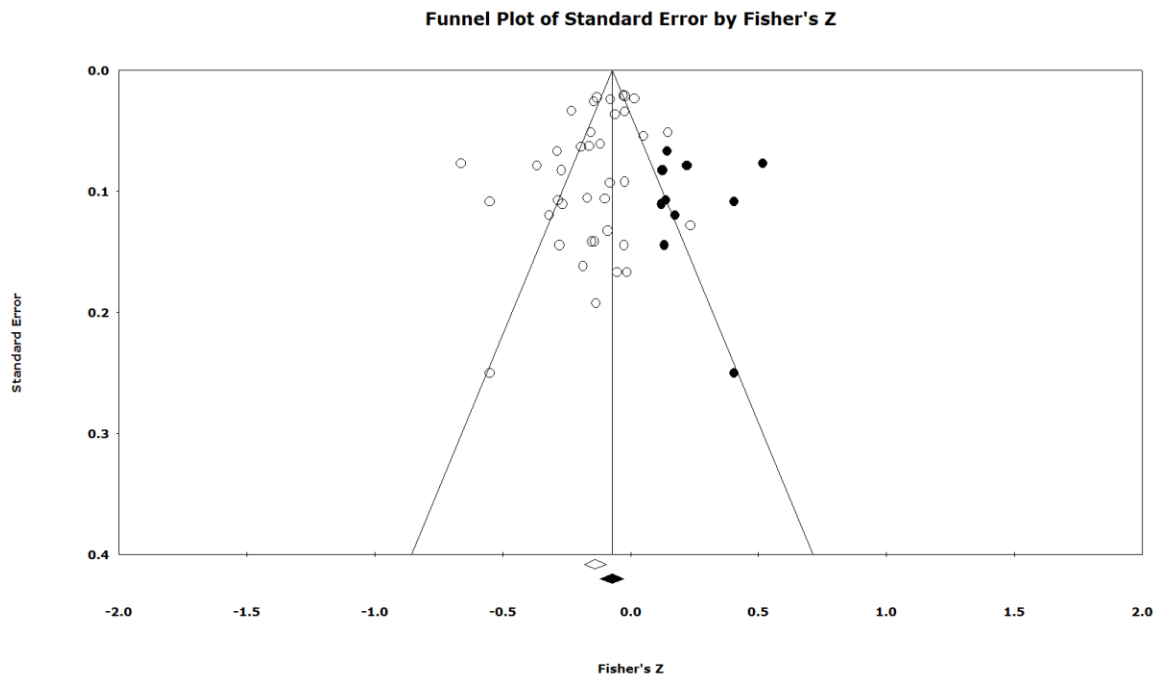

Legend: The funnel plot is a measure of study size (y-axis) as a function of effect size (x axis). Observed studies are indicated by white circles, while dark circles indicate their imputed counterparts when assymtry is detected. The middle vertical line is the mean prevalence estimate, and the contour lines (to its left and right) represent the region within which 95% of observed studies should lie in the absence of publication bias. The white diamond represents the observed mean effect size, and the black diamond represents the adjusted mean effect size. Studies with large sample sizes appear toward the top of the graph, and tend to cluster near the mean effect size, whereas studies with smaller sample sizes appear to the bottom-middle right of the graph. Due to the tendency to have more sampling variation in effect size estimates in studies with smaller sample sizes, these studies will be dispersed across a range of values (bottom-middle right of plot).

**eFigure 2.** Funnel Plot of Studies Examining Background Television to Child Language

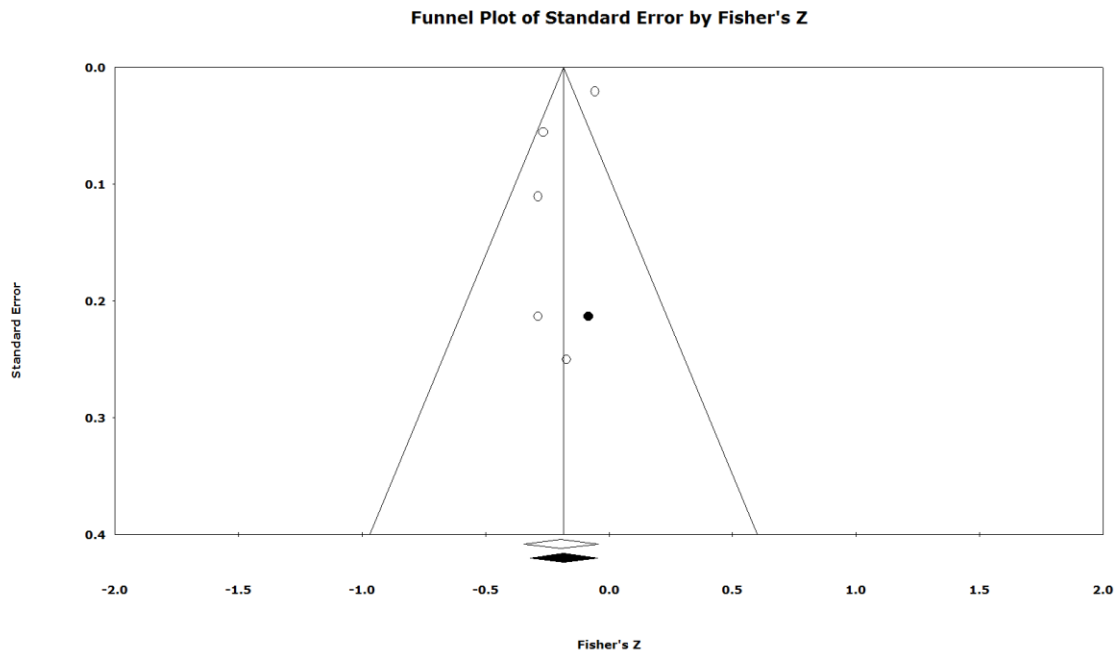

Legend: The funnel plot is a measure of study size (y-axis) as a function of effect size (x axis). Observed studies are indicated by white circles, while dark circles indicate their imputed counterparts when asymmetry is detected. The middle vertical line is the mean prevalence estimate, and the contour lines (to its left and right) represent the region within which 95% of observed studies should lie in the absence of publication bias. The white diamond represents the observed mean effect size, and the black diamond represents the adjusted mean effect size (in the event of asymmetry). Studies with large sample sizes appear toward the top of the graph, and tend to cluster near the mean effect size, whereas studies with smaller sample sizes appear to the bottom-middle right of the graph. Due to the tendency to have more sampling variation in effect size estimates in studies with smaller sample sizes, these studies will be dispersed across a range of values (bottom-middle right of plot).

**eFigure 3.** Funnel Plot of Studies Examining Educational Programming to Child Language

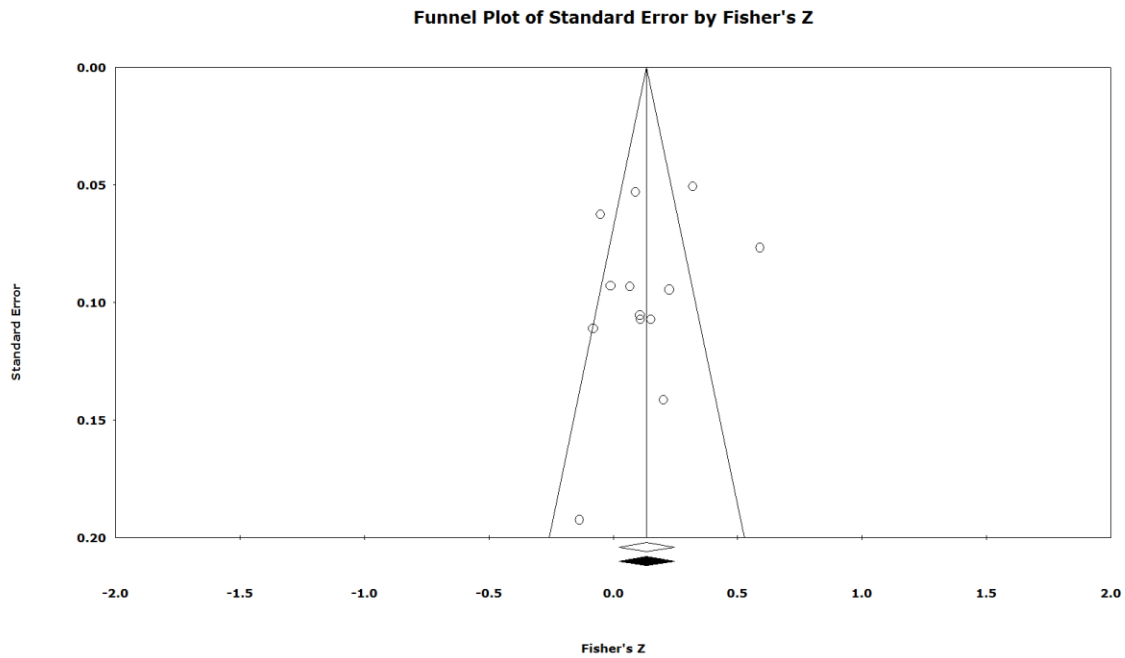

Legend: The funnel plot is a measure of study size (y-axis) as a function of effect size (x axis). Observed studies are indicated by circles. The middle vertical line is the mean prevalence estimate, and the contour lines (to its left and right) represent the region within which 95% of observed studies should lie in the absence of publication bias. The white diamond represents the observed mean effect size, and the black diamond represents the adjusted mean effect size (in the event of asymmetry). Studies with large sample sizes appear toward the top of the graph, and tend to cluster near the mean effect size, whereas studies with smaller sample sizes appear to the bottom-middle right of the graph. Due to the tendency to have more sampling variation in effect size estimates in studies with smaller sample sizes, these studies will be dispersed across a range of values (bottom-middle right of plot).

**eFigure 4.** Funnel Plot of Studies Examining Co-viewing to Child Language

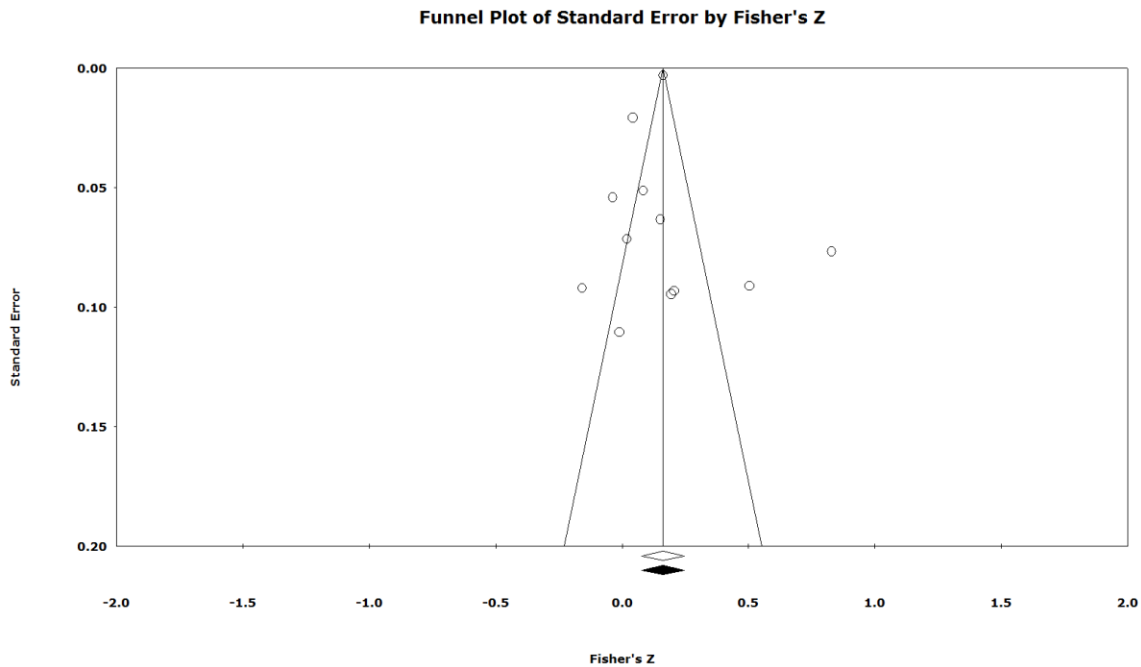

Legend: The funnel plot is a measure of study size (y-axis) as a function of effect size (x axis). Observed studies are indicated by circles. The middle vertical line is the mean prevalence estimate, and the contour lines (to its left and right) represent the region within which 95% of observed studies should lie in the absence of publication bias. The white diamond represents the observed mean effect size, and the black diamond represents the adjusted mean effect size (in the event of asymmetry). Studies with large sample sizes appear toward the top of the graph, and tend to cluster near the mean effect size, whereas studies with smaller sample sizes appear to the bottom-middle right of the graph. Due to the tendency to have more sampling variation in effect size estimates in studies with smaller sample sizes, these studies will be dispersed across a range of values (bottom-middle right of plot).

**eFigure 5.** Meta-Regression Scatterplot Examining Child Sex on the Association between Co-Viewing and Child Language

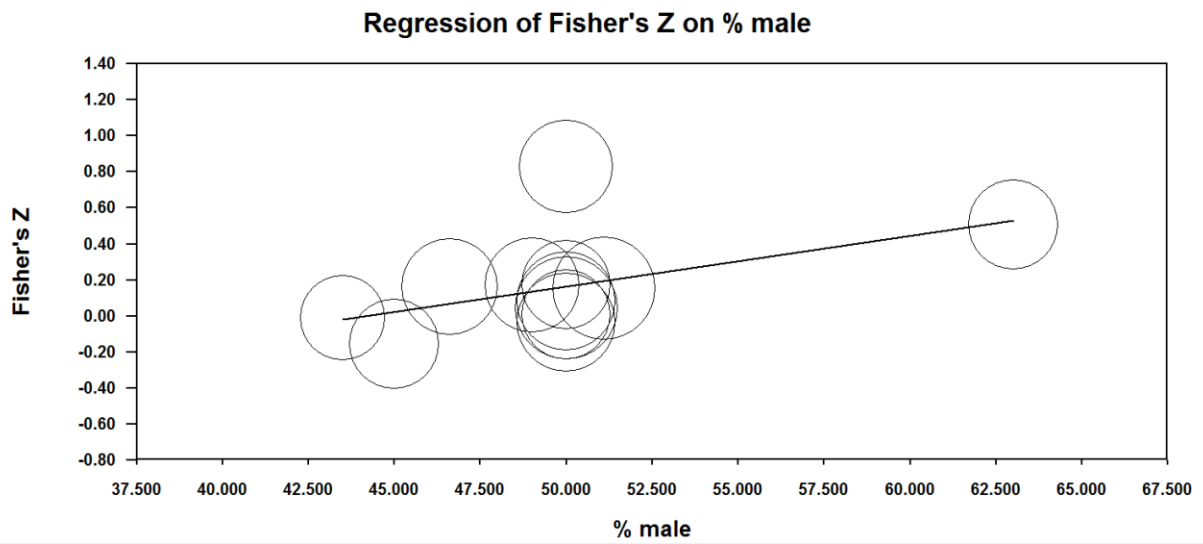

**eFigure 6.** Funnel Plot of Studies Examining Age of Onset of Screen Use to Child Language

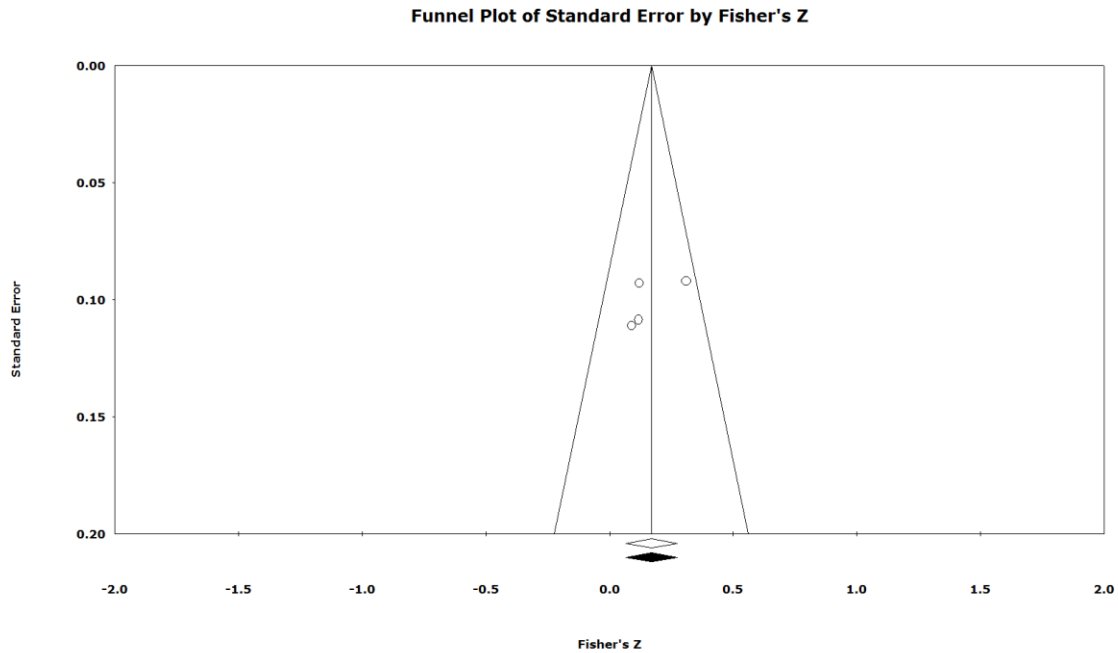

Legend: The funnel plot is a measure of study size (y-axis) as a function of effect size (x axis). Observed studies are indicated by circles. The middle vertical line is the mean prevalence estimate, and the contour lines (to its left and right) represent the region within which 95% of observed studies should lie in the absence of publication bias. The white diamond represents the observed mean effect size, and the black diamond represents the adjusted mean effect size (in the event of asymmetry). Studies with large sample sizes appear toward the top of the graph, and tend to cluster near the mean effect size, whereas studies with smaller sample sizes appear to the bottom-middle right of the graph. Due to the tendency to have more sampling variation in effect size estimates in studies with smaller sample sizes, these studies will be dispersed across a range of values (bottom-middle right of plot).



## References

1. Alloway TP, Williams S, Jones B, Cochrane F. Exploring the impact of television watching on vocabulary skills in toddlers. *Early Childhood Education Journal*. 2014;42(5):343-349.
2. Arraf S. An analysis of the effects of television viewing patterns, IQ, SES and gender on receptive and expressive language development of preschool children. *Dissertation Abstracts International*. 1991;52(2-A):420.
3. Barr R, Lauricella A, Zack E, Calvert SL. Infant and Early Childhood Exposure to Adult-Directed and Child-Directed Television Programming: Relations with Cognitive Skills at Age Four. *Merrill-Palmer Quarterly*. 2010;56(1):21-48.
4. Hudon TM, Fennell CT, Hoftyzer M. Quality not quantity of television viewing is associated with bilingual toddlers' vocabulary scores. *Infant Behavior and Development*. 2013;36(2):245-254.
5. Rice ML. Preschoolers' QUIL: Quick incidental learning of words. *Conti-Ramsden, Gina [Ed]; Snow, Catherine E [Ed] (1990) Children's language, Vol 7 (pp 171-195) xiii, 337 pp Hillsdale, NJ, US: Lawrence Erlbaum Associates, Inc; US*. 1990:171-195.
6. Selnow G, Bettingaus E. Television exposure and language development. *Journal of Broadcasting*. 1982;26(1):469-479.
7. Tomopoulos S, Dreyer BP, Berkule S, Fierman AH, Brockmeyer C, Mendelsohn AL. Infant media exposure and toddler development. *Archives of Pediatrics & Adolescent Medicine*. 2010;164(12):1105-1111.
8. Wright JC, Huston AC, Murphy KC, et al. The relations of early television viewing to school readiness and vocabulary of children from low-income families: The early window project. *Child Development*. 2001;72(5):1347-1366.
9. Yang X, Chen Z, Wang Z, Zhu L. The Relations between Television Exposure and Executive Function in Chinese Preschoolers: The Moderated Role of Parental Mediation Behaviors. *Frontiers in Psychology*. 2017;8:1833.
10. Zimmerman FJ, Christakis DA, Meltzoff AN. Associations between Media Viewing and Language Development in Children Under Age 2 Years. *Journal of Pediatrics*. 2007;151(4):364-368.
11. Allen L, Cipelewski J, Stanovich KE. Multiple indicators of children's reading habits and attitudes: Construct validity and cognitive correlates. *Journal of Educational Psychology*. 1992;84(4):489-503.
12. Bittman M, Rutherford L, Brown J, Unsworth L. Digital Natives? New and Old Media and Children's Outcomes. *Australian Journal of Education*. 2011;55(2):161-175.
13. Blankson A, O'Brien M, Leerkes EM, Calkins SD, Marcovitch S. Do hours spent viewing television at ages 3 and 4 predict vocabulary and executive functioning at age 5? *Merrill-Palmer Quarterly*. 2015;61(2):264-289.
14. Byeon H, Hong S. Relationship between television viewing and language delay in toddlers: Evidence from a Korea national cross-sectional survey. *PLoS ONE*. 2015;10 (3) (no pagination)(e0120663).

15. Castles A, McLean GMT, Bavin E, et al. Computer use and letter knowledge in pre-school children: A population-based study. *Journal of Paediatrics and Child Health*. 2013;49(3):193-198.
16. Chonchaiya W, Pruksananonda C. Television viewing associates with delayed language development. *Acta Paediatrica, International Journal of Paediatrics*. 2008;97(7):977-982.
17. Christakis DA, Gilkerson J, Richards JA, et al. Audible television and decreased adult words, infant vocalizations, and conversational turns: A population-based study. *Archives of Pediatrics and Adolescent Medicine*. 2009;163(6):554-558.
18. Duch H, Fisher EM, Ensari I, et al. Association of screen time use and language development in hispanic toddlers: A cross-sectional and longitudinal study. *Clinical Pediatrics*. 2013;52(9):857-865.
19. Lee E-Y, Spence JC, Carson V. Television viewing, reading, physical activity and brain development among young South Korean children. *Journal of science and medicine in sport*. 2017;20(7):672-677.
20. Levin SR. Preschool individual differences and patterns of television viewing. *Dissertation Abstracts International*. 1978;39(1-B):444-445.
21. Lin L-Y, Cherng R-J, Chen Y-J, Chen Y-J, Yang H-M. Effects of television exposure on developmental skills among young children. *Infant Behavior & Development*. 2015;38:20-26.
22. Linebarger DL, Walker D. Infants' and Toddlers' Television Viewing and Language Outcomes. *American Behavioral Scientist*. 2005;48(5):624-645.
23. Linebarger DL, Moses A, Garrity Liebeskind K, McMennamin K. Learning vocabulary from television: Does onscreen print have a role? *Journal of Educational Psychology*. 2013;105(3):609-621.
24. Masur EF, Flynn V, Olson J. Infants' background television exposure during play: Negative relations to the quantity and quality of mothers' speech and infants' vocabulary acquisition. *First Language*. 2016;36(2):109-123.
25. McKean C, Mensah FK, Eadie P, et al. Levers for language growth: Characteristics and predictors of language trajectories between 4 and 7 years. *PLoS ONE*. 2015;10 (8) (no pagination)(e0134251).
26. Mendelsohn AL, Brockmeyer CA, Dreyer BP, Fierman AH, Berkule-Silberman SB, Tomopoulos S. Do verbal interactions with infants during electronic media exposure mitigate adverse impacts on their language development as toddlers? *Infant and Child Development*. 2010;19(6):577-593.
27. Moon JH, Cho SY, Lim SM, et al. Smart device usage in early childhood is differentially associated with fine motor and language development. *Acta Paediatrica, International Journal of Paediatrics*. 2018.
28. Nelson K. Structure and Strategy in Learning to Talk. *Monographs of the Society for Research in Child Development*. 1973;38(1/2):1-135.
29. Pagani LS, Fitzpatrick C, Barnett TA. Early childhood television viewing and kindergarten entry readiness. *Pediatric Research*. 2013;74(3):350-355.

30. Patterson JL. Relationships of expressive vocabulary to frequency of reading and television experience among bilingual toddlers. *Applied Psycholinguistics*. 2002;23(4):493-508.
31. Richert RA, Robb MB, Fender JG, Wartella E. Word learning from baby videos. *Archives of Pediatrics & Adolescent Medicine*. 2010;164(5):432-437.
32. Rosenqvist J, Lahti-Nuutila P, Holdnack J, Kemp SL, Laasonen M. Relationship of TV watching, computer use, and reading to children's neurocognitive functions. *Journal of Applied Developmental Psychology*. 2016;46:11-21.
33. Ruangdaraganon N, Chuthapisith J, Mo-suwan L, Kriweradechachai S, Udomsubpayakul U, Choprapawon C. Television viewing in Thai infants and toddlers: Impacts to language development and parental perceptions. *BMC Pediatrics*. 2009;9 (no pagination)(34).
34. Schmidt ME, Rich M, Rifas-Shiman SL, Oken E, Taveras EM. Television viewing in infancy and child cognition at 3 years of age in a US cohort. *Pediatrics*. 2009;123(3):e370-e375.
35. Taylor G, Monaghan P, Westermann G. Investigating the association between children's screen media exposure and vocabulary size in the UK. *Journal of Children and Media*. 2018;12(1):51-65.
36. van den Heuvel M, Ma J, Borkhoff CM, et al. Mobile Media Device Use is Associated with Expressive Language Delay in 18-Month-Old Children. *Journal of Developmental & Behavioral Pediatrics*. 2019;40(2):99-104.
37. Zimmerman FJ, Gilkerson J, Richards JA, et al. Teaching by listening: The importance of adult-child conversations to language development. *Pediatrics*. 2009;124(1):342-349.
